# Supplementary material for: EGCG Attenuates CA1 Neuronal Death by Regulating GPx1, NF-κB S536 Phosphorylation and Mitochondrial Dynamics in the Rat Hippocampus following Status Epilepticus
Source: MDPI journal article supplement (doi:10.3390/antiox12040966), 2023-04-20
Supplement: s1 [file s1]

## Supplementary Information

# **EGCG attenuates CA1 neuronal death by regulating GPx1, NF- $\kappa$ B S536 phosphorylation and mitochondrial dynamics in the rat hippocampus following status epilepticus**

Ji-Eun Kim,<sup>1</sup> Tae-Hyun Kim,<sup>1</sup> Tae-Cheon Kang<sup>1,\*</sup>

<sup>1</sup>Department of Anatomy and Neurobiology, Institute of Epilepsy Research, College of Medicine, Hallym University, Chuncheon 24252, South Korea

\* Correspondence to: T. -C. Kang, Department of Anatomy and Neurobiology, College of Medicine, Hallym University, Chuncheon, Kangwon-Do 24252, South Korea; Tel: +82-33-248-2524; Fax: +82-33-248-2525; E-mail: tckang@hallym.ac.kr

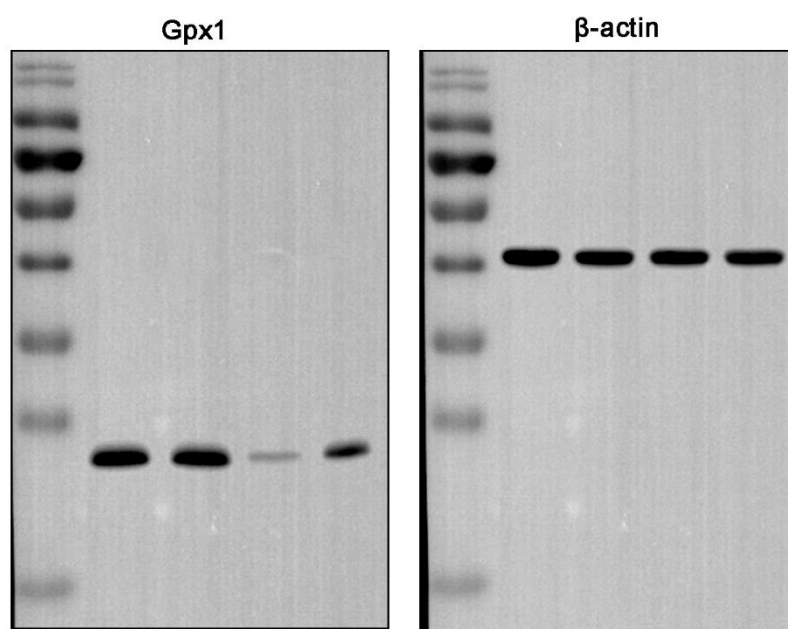

Supplementary Figure 1. Full-length gel images of Western blots in Figure 3A.

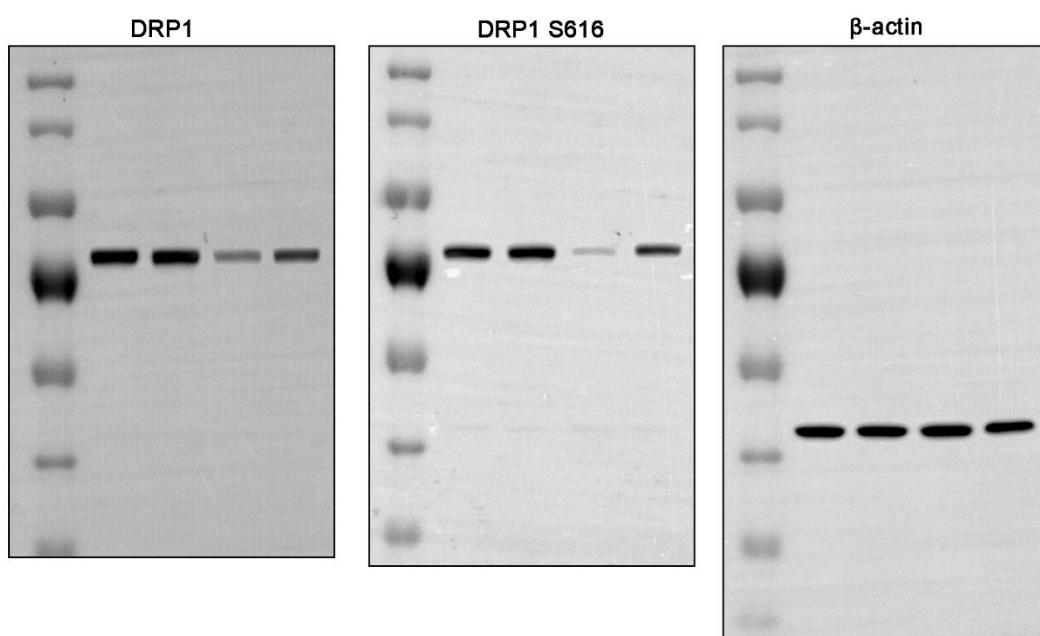

Supplementary Figure 2. Full-length gel images of Western blots in Figure 4A.

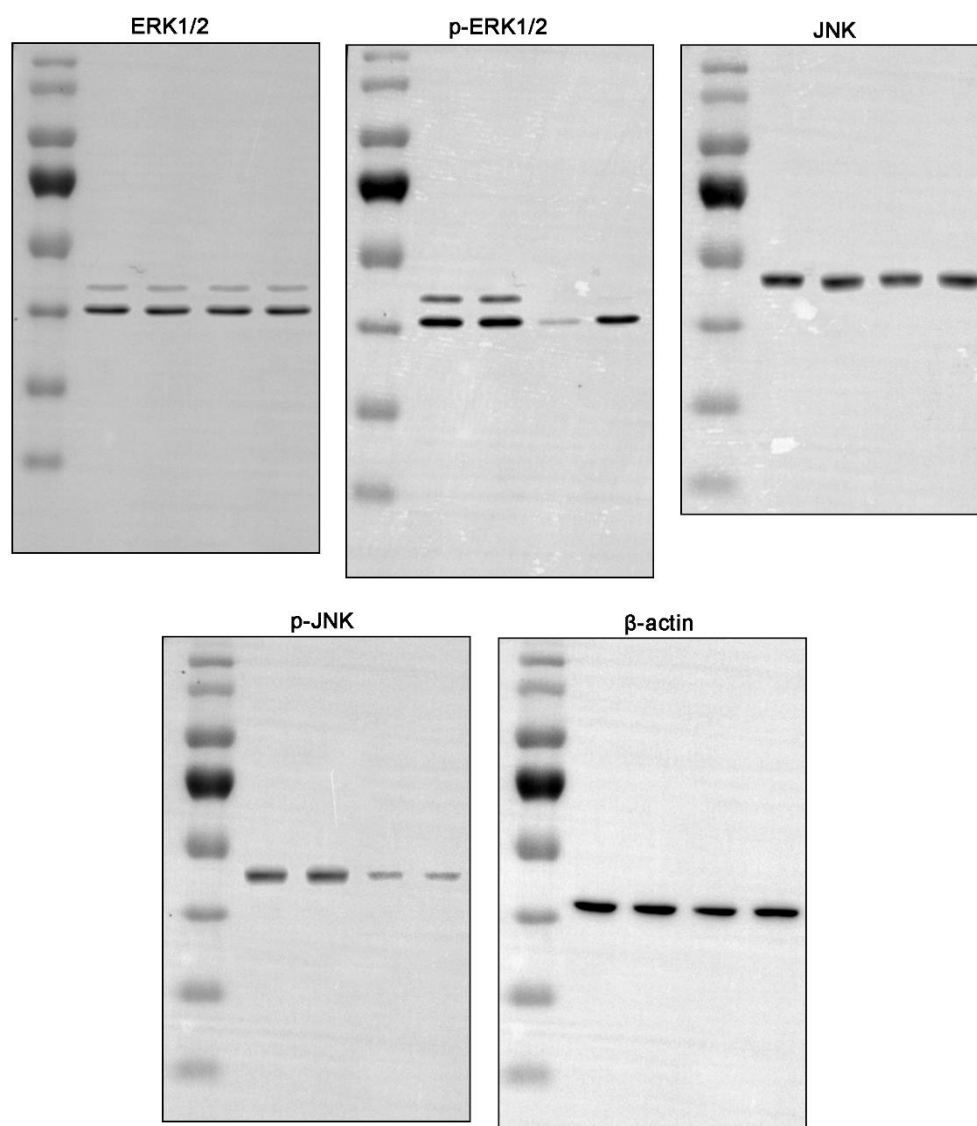

Supplementary Figure 3. Full-length gel images of Western blots in Figure 5A.

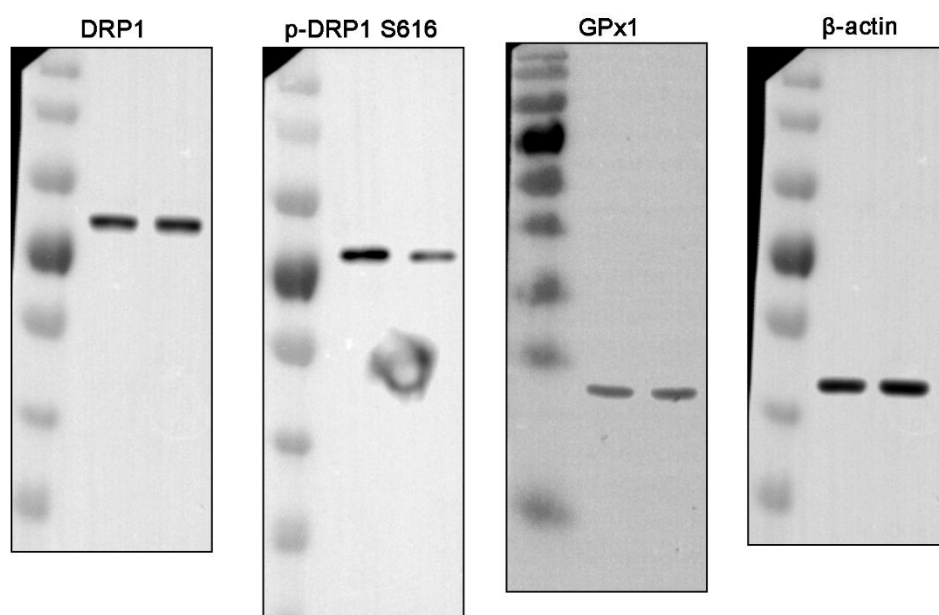

Supplementary Figure 4. Full-length gel images of Western blots in Figure 10A.
